# Supplementary material for: Structural basis for the multitasking nature of the potato virus Y coat protein
Source: PubMed Central journal article supplement — Sci Adv. 2019 Jul 17;5(7):eaaw3808. doi: 10.1126/sciadv.aaw3808 (PMC6636993; doi:10.1126/sciadv.aaw3808), 2019-07-17
Supplement: aaw3808_SM.pdf [file aaw3808_SM.pdf]

## Supplementary Materials for

### Structural basis for the multitasking nature of the potato virus Y coat protein

Andreja Kežar, Luka Kavčič, Martin Polák, Jiří Nováček, Ion Gutiérrez-Aguirre, Magda Tušek Žnidarič, Anna Coll, Katja Stare, Kristina Gruden, Maja Ravnikar, David Pahovnik, Ema Žagar, Franci Merzel, Gregor Anderluh, Marjetka Podobnik\*

\*Corresponding author. Email: marjetka.podobnik@ki.si

Published 17 July 2019, *Sci. Adv.* **5**, eaaw3808 (2019)

DOI: 10.1126/sciadv.aaw3808

#### The PDF file includes:

Supplementary Text S1. Detailed description of protein-protein interactions in PVY  
Supplementary Text S2. Detailed description of protein-protein interactions in VLP  
Supplementary Text S3. Importance of the CP N terminus for longitudinal assembly of VLPs  
Supplementary Text S4. Redundancy of CP C termini for VLP filament or octameric ring  
Fig. S1. Cryo-EM data collection, image processing, and model building for the PVY virion.  
Fig. S2. Consensus sequence alignment of potyviral CPs.  
Fig. S3. Biophysical characterization of PVY virions and various VLP constructs.  
Fig. S4. Structural comparison of PVY to other filamentous viruses, flexible and rod shaped.  
Fig. S5. Details of the PVY interaction network.  
Fig. S6. Electrostatic interactions are crucial for PVY virion assembly.  
Fig. S7. Cryo-EM data collection, image processing, and model building for VLP.  
Fig. S8. Surface electrostatic potential of VLPs.  
Fig. S9. Water channels in different types of filamentous particles.  
Table S1. Cryo-EM data collection and refinement statistics of PVY and VLP.  
Table S2. Primers and probes used for in planta functional analysis of PVY mutants and their properties.  
Legend for data S1  
Legend for tables S3 to S5  
References (56–60)

#### Other Supplementary Material for this manuscript includes the following:

(available at [advances.sciencemag.org/cgi/content/full/5/7/eaaw3808/DC1](https://advances.sciencemag.org/cgi/content/full/5/7/eaaw3808/DC1))

Data S1 (Microsoft Excel format). Relative concentration of PVY RNA as measured in the leaves of *N. clevelandii* including tables S3 to S5:

Table S3. Relative concentration of PVY RNA as measured in bombarded leaves of *N. clevelandii* 7 dpb (experiment 1).

Table S4. Relative concentration of PVY RNA as measured in upper nonbombarded leaves of *N. clevelandii* 14 dpb (experiment 1).

Table S5. Relative concentration of PVY RNA as measured in bombarded leaves of *N. clevelandii* (experiment 2).

## Supplementary Text S1. Detailed description of protein-protein interactions in PVY

Numerous protein-protein interactions in the cluster of 13 interconnected CP units are translationally repeated along the axis of the viral filament (Fig. 2A and fig. S5). The CP<sup>n</sup> N-terminal region stretches all the way to CP<sup>n-10</sup> unit. The groove between the  $\beta$ -hairpin loop and helices  $\alpha$ 3 and  $\alpha$ 2 in CP<sup>n-10</sup> core nests CP<sup>n</sup> residues Val44 – Lys48 in a combination of electrostatic and hydrophobic interactions, and the same is true for the CP<sup>n+10</sup> – CP<sup>n</sup> interface (fig. S5A). Interactions between CP<sup>n</sup> – CP<sup>n-2</sup> (counterpart CP<sup>n+2</sup> – CP<sup>n</sup>) are limited to the salt bridge between Lys58 at the sharp turn in the N-terminal region of CP<sup>n</sup>, and Asp138 in the loop of CP<sup>n-2</sup>  $\beta$ -hairpin (fig. S5B). CP<sup>n</sup> – CP<sup>n-1</sup> interactions (counterpart CP<sup>n+1</sup> – CP<sup>n</sup>) are mainly based on CP<sup>n</sup> residues Ala49 – Asn82 folding on the outer surface of the CP<sup>n-1</sup> core (fig. S5C), with alternating electrostatic and hydrophobic interactions anchoring the N-terminal peptide of CP<sup>n</sup> to the core of CP<sup>n-1</sup>. The CP<sup>n</sup> core sits on top of the CP<sup>n-8</sup> and CP<sup>n-9</sup> cores (fig. S5D). These interactions are mainly electrostatic and are mirrored by interactions between CP<sup>n</sup>, CP<sup>n+8</sup> and CP<sup>n+9</sup> units. The C-terminal region of CP<sup>n</sup> unit is completely defined and extends inside the lumen all the way up to the core of CP<sup>n+17</sup> (Fig. 2A). The CP<sup>n</sup>  $\alpha$ 8-helix (Val211 – Leu225) and the first residues of the extended C-terminal region, Lys226 – Arg231, are stacked between C-terminal regions of CP<sup>n-8</sup> and CP<sup>n-9</sup>, based on mixed electrostatic and hydrophobic interactions (fig. S5E). The following CP<sup>n</sup> residues, Leu232 – Ile239, are sandwiched between  $\alpha$ 8-helices of CP<sup>n+8</sup> and CP<sup>n+9</sup>, the core residues Val187 – Arg191 of CP<sup>n+8</sup>, and Asn245 – Thr251 of CP<sup>n-9</sup> (fig. S5F). CP<sup>n</sup> residues Ser240 – Thr251 run along Ser227 – Ile239 of CP<sup>n+9</sup>, while Ser227 – Ile239 in the neighboring CP<sup>n+8</sup> deviate away from CP<sup>n</sup> to run along Thr240 – Thr251 of CP<sup>n-1</sup> (fig. S5G). C-terminal residues Glu244 – Glu252 of CP<sup>n</sup> run in parallel along the  $\alpha$ 8-helix of CP<sup>n+17</sup>, predominantly based on electrostatic interactions (fig. S5H). Due to helical symmetry, the  $\alpha$ 8-helix of CP<sup>n</sup> interacts in the same manner with C-terminal residues of CP<sup>n-17</sup>. The interactions of approximately 20 final residues (Glu247 – Met267) further strengthen the contacts between CP<sup>n</sup> and CP<sup>n-1</sup> (fig. S5I). After Thr251, the extended C-terminal peptide of CP<sup>n</sup> undergoes two sharp turns, which end in Thr260, from which it extends to the final residue Met267 again, but this time in almost perpendicular direction to the filament. This final region (Thr260 – Met267) is sandwiched between similar regions of CP<sup>n-1</sup> and CP<sup>n+1</sup> (fig. S5I).

### **Supplementary Text S2. Detailed description of protein-protein interactions in VLP**

The interaction network in VLPs is decreased to only five CPs (Fig. 3D), not taking into account potential random interactions between the flexible C-terminal regions. Each ring is held together via interactions between neighboring core domains. Similar to authentic virions, the N-terminal region between residues Met54 and Ala85 of CP<sup>n</sup> acts as a clip and fixes CP<sup>n</sup> onto the core of CP<sup>n-1</sup> (Figs. 3, C to E). Electrostatic interactions prevail (fig. S8), with a patch of hydrophobic interactions between  $\alpha$ 1-helix of CP<sup>n</sup> and  $\alpha$ 5 of CP<sup>n-1</sup> core (Fig. 3E, fig. S8B). The inter-ring connection is limited to interactions between the extended region of residues Thr43 to Ala49 of CP<sup>n</sup> and those of the  $\alpha$ -hairpin loop and helices  $\alpha$ 2 -  $\alpha$ 4 of CP<sup>i-2</sup> (Fig. 3E). In contrast to virions (Fig. 1D), there is no interaction between the N-terminal region of CP<sup>n</sup> and CP<sup>n-2</sup> in VLP.

### **Supplementary Text S3. Importance of the CP N terminus for longitudinal assembly of VLPs**

To study the importance of the N-terminal region in longitudinal assembly of octameric VLP rings, N-terminal deletion mutants were prepared (Fig. 5, A and B). Of these, only the mutant proteins  $\Delta$ N49 and  $\Delta$ N69 were soluble (Fig. 5B) and both had circular dichroism spectra comparable to wild-type CP (fig. S3E). SEC-MALS analysis of purified  $\Delta$ N49 protein revealed a 210 kDa complex, consistent with the octameric assembly of  $\Delta$ N49 (fig. S3D). In addition, a smaller population of high molecular weight aggregates were also present, which were not filamentous structures, as confirmed by negative stain TEM (Fig. 5B, middle panel). Based on the VLP interaction network,  $\Delta$ N49 should form octameric rings and  $\Delta$ N69 should remain monomeric (Fig. 3E). Indeed, cryo-EM revealed that  $\Delta$ N49 oligomers were octameric rings with the tendency to adhere to each other, thereby forming stacks of up to four rings (Fig. 5B, bottom panel). No filaments were detected for  $\Delta$ N69 (Fig. 5B, middle panel) and SEC-MALS detected monomers and unspecific aggregates (fig. S3D).

#### **Supplementary Text S4. Redundancy of CP C termini for VLP filament or octameric ring**

CP C-terminal deletion mutant proteins were prepared to assay the impact of the disordered C-terminus on VLP filament shape and stability (Fig. 5, A and C). These mutant proteins were all soluble, and similarly to PVY virions and VLPs formed from wild-type CP, partial proteolysis could be observed in final purified samples (Fig. 5C, upper panel right, fig. S3C). Interestingly, filament formation was preserved even in the absence of the 60 C-terminal residues, e.g. up to Ser207, which is located at the start of the final  $\alpha$ 8-helix (Fig. 5C, middle and bottom panels). We further purified and characterized  $\Delta$ C40, which still includes the  $\alpha$ 8 helix, and  $\Delta$ C60, which lacks it. Circular dichroism spectra (fig. S3E) and negative stain TEM images of purified VLPs formed of  $\Delta$ C40 and  $\Delta$ C60 (Fig. 5C, middle and bottom panel right) were comparable to wild-type VLPs (fig. S7A). In the case of  $\Delta$ C40 VLPs we could observe the inner channel of the filament (Fig. 5C, middle panel right, inset).

We prepared a double deletion mutant,  $\Delta$ N49C40 (Fig. 5, A and D), to remove the flexible C-terminal extension still present in the octameric ring of  $\Delta$ N49. Interestingly, in addition to octameric rings detected by SEC-MALS (fig. S3D), loosely bound filaments (generally less than 500 nm long) were detected by negative stain TEM (Fig. 5D, upper and middle panel left), which were significantly longer than  $\Delta$ N49-derived stacks of rings (Fig. 5B bottom). This showed that the C-terminal region is not only dispensable for VLP filament formation, but may even contribute to its destabilization. Indeed, after we removed the C-termini of deletion mutants  $\Delta$ N29 and  $\Delta$ N39 (which were insoluble), the resulting  $\Delta$ N29C40 and  $\Delta$ N39C60 proteins could form long filaments (Fig. 5D).

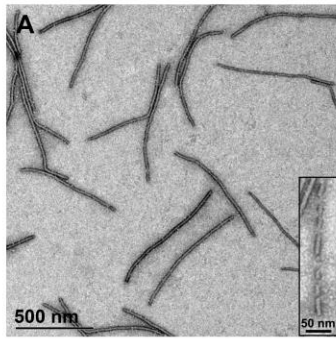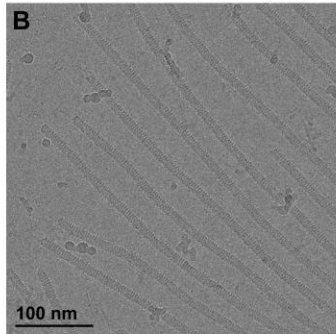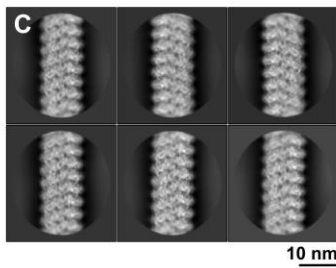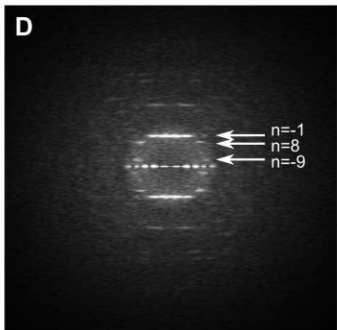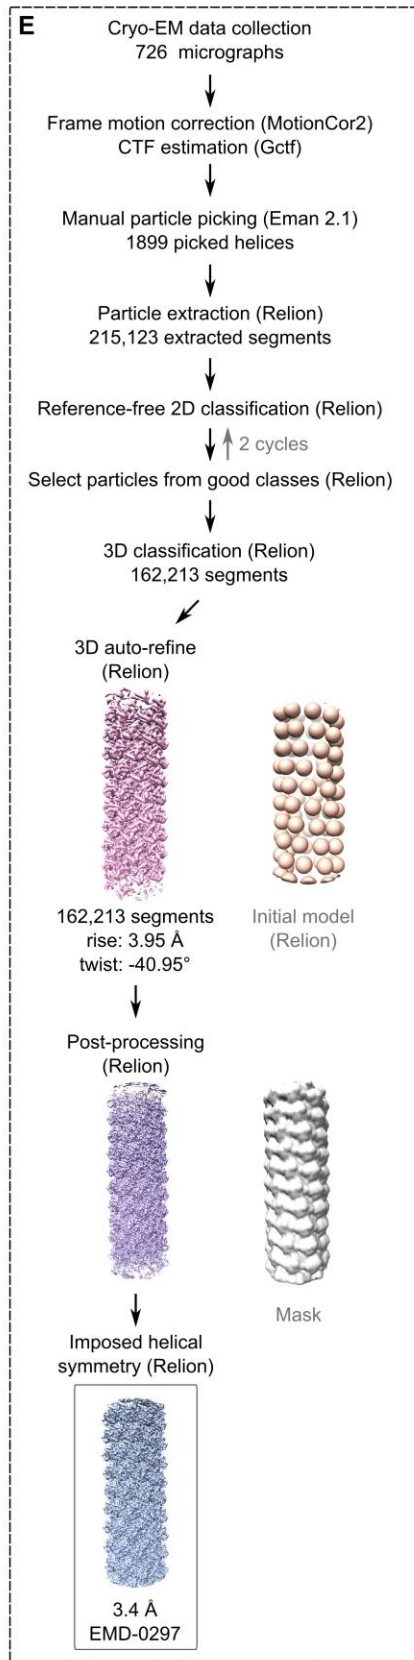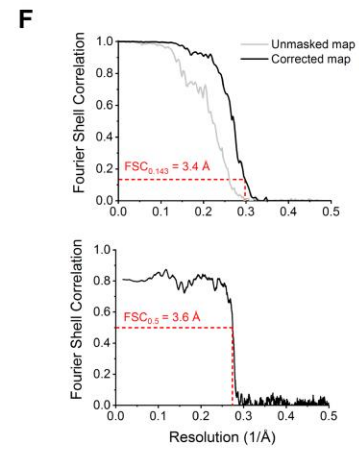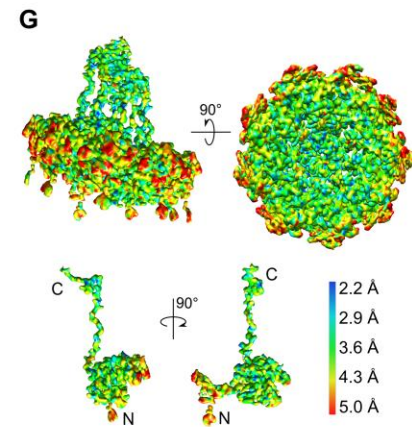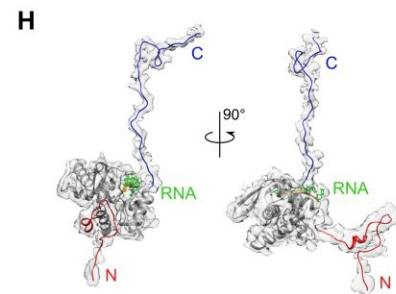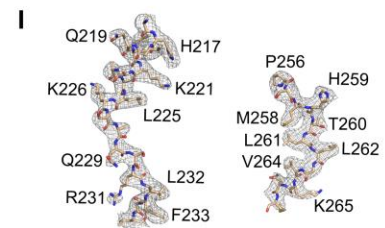

**Fig. S1. Cryo-EM data collection, image processing, and model building for the PVY virion.** (A) Negative-stain TEM micrograph of PVY. Inset: an example of a damaged PVY filament. (B) Cryo-EM micrograph of PVY. (C) Examples of PVY 2D class averages. (D) Sum of the power spectra obtained for 53 selected PVY segments. The black lines highlight the  $n = -1$  layer line at  $1/35 \text{ \AA}$ , the  $n = 8$  layer line at  $1/43 \text{ \AA}$ , and  $n = -9$  layer line at  $1/160 \text{ \AA}$  corresponding to one-start left-handed helix. (E) Flowchart of the data collection and processing for the PVY virion. (F) Fourier shell correlation (FSC) curves for the final reconstruction of PVY density map (top) and between the PVY model and density map (bottom). (G) Local resolution analysis of one turn of the PVY filament (top) and one extracted CP unit (below), estimated using MonoRes (34). (H) Surface representation of density map with a structural model of PVY CP (N-terminal region: red, core: gray, C-terminal region: blue). (I) The densities of two PVY CP segments are shown in a mesh representation (maps contoured at  $3\sigma$ ) with the corresponding atomic model within, showing the resolution of individual side chains.



1 10 20 30

```

PVY .....GNDTIDAG.....GSX...KKDAKPEQGSIQPNPKGKDK.....
BBzMV SGTETNDDPSRTIDAGSARGTQPSX.....TTTTAPSTFGQPTTTTAPSSSSSTPPRSTQIAPVVRDR
BiMoV .....AKDEEKIDAGD.....PAKKKEQIPPPENKAITK.....GDKK.....
BiMV .....VDETIIDAG.....KDKAKENKD...KQISNPATGGLAKAK.....
BruMV .....SAEESTIDAGK.....GNKSTKKEVAAPT.....KEANVSKGKEF
BYMV .....SDQEKINIDAG.....XKDKKXKNEENPKKSEGGSSRQIVPDR
ChiVMV .....SDEKLNIDAG.....RVKGEDSSSKPADKQATEKKSXVXGQAPQSRQSEMEVQVDR
CIYVV .....SDEKLNIDAG.....QKSKDK...EPQRDQEGENSNRQIIPDR
JGMV .....SGNE...IDAGRQKSATPAANQASGDGKPAQTATAENKPPSSDNTSNAQGTSTKGDGEGSGTNAATAKKK
LMV .....QGDTKIDAGQ.....GSKTDDKQSSAHPDKNIITEKGGSSGQMKK...DD
PeMoV .....SGENKSKVIDAAAKLKEKEK.....EKHKKEEETSEG.....TSQTKPE
PepMoV .....SSSRSDTIIDAGE.....EKKKNK...EVATVSDGM.....KKKEVESTRS
PepYMV .....ADEKLAIDL.....DAAEEDKKKRAKNEQPAD.ASNLKGKEGVSTSRDN
PeSMV .....ADTTVIDAGE.....EKEKAGSGKLLKVEGSS...DVKATDK.....
PRSV .....SKNEAVDAGLNEKLLK.....EKEKQKEKEKEKQKE...KEKD.DASDNDVSTSTKTGERDR
PTV .....AKDDSGTIDAGK.....DQAKDKAAKTATAG.....ESSVKKSEK
FVV .....AKEEASSIDAGK.....DPAKESAKLPAAAG.....EQSSKSLEER
SMV .....SGKEKE.GDMIDAG.....KDPKKTST.....SSKAG.....TSSK
SuCmOV .....GDNIDAG.....KDKKDEKDDKKNQVASTASDXKXKSK.....
TEV .....SGTVIDAGADAG.....KKDKQDDKVAEQAS.....KDR
TuMV .....AGETVIDAGLTEEQKQAEKEKE...REKAEKERE...RQKQALALKKGNX.....AQEEGE...RDK
WMV .....LQSGKEAV.ENIDAG.....KDSKKTSGKGDQKPNQSTQGGSEKQTKTGTVSK

```

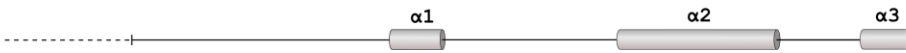

40 50 60 70 80 90 100 110

```

PVY DYNAGTSGTHIVPRIKAITSKMRMPKSKGATVLNLEHLLEYIPQOHDISNTRATOSQFDITWFEAVRXAYDI.GETEMPTIV
BBzMV DVDA GSTN.FIIPRIKIPMTGKMRILPARYRGTAINVEFLLOYKPDQFDLSNATATREOYDAWCDAAKRRYAIIDEEEQFTTL
BiMoV DYNAGTSGTMTVPRIKAITTKMRILPKARGSVVLNLDQLLEYIPQOVDLSNTRATQEFSLWFEYKNSYVDI.SDTEMATL
BiMV DYNAGCAGSTHTVPRIKAITSKMRMPKSKGAVALNLDHLLEYIPQOVDISNTRATQAFDITWFEAVRTAYDI.SETEMPTIV
BruMV DYNAGTGTIVNVPRIKAITSKMRMPKSKGAVALNLDHLLEYIPQOVDISNARSTQSFNINWFEVQKAYDI.QDSEMQIT
BYMV DYNAGTGTIVNVPRIKAITSKMRMPKSKGAVALNLDHLLEYIPQOVDISNTRATQAFDITWFEAVRXAYDI.SDTEMATL
ChiVMV DYNAGTGTIVNVPRIKAITSKMRMPKSKGAVALNLDHLLEYIPQOVDISNTRATQAFDITWFEAVRXAYDI.SDTEMATL
CIYVV DYNAGTGTIVNVPRIKAITSKMRMPKSKGAVALNLDHLLEYIPQOVDISNTRATQAFDITWFEAVRXAYDI.SDTEMATL
JGMV DYNAGTGTIVNVPRIKAITSKMRMPKSKGAVALNLDHLLEYIPQOVDISNTRATQAFDITWFEAVRXAYDI.SDTEMATL
LMV DYNAGTGTIVNVPRIKAITSKMRMPKSKGAVALNLDHLLEYIPQOVDISNTRATQAFDITWFEAVRXAYDI.SDTEMATL
PeMoV DYNAGTGTIVNVPRIKAITSKMRMPKSKGAVALNLDHLLEYIPQOVDISNTRATQAFDITWFEAVRXAYDI.SDTEMATL
PepMoV DYNAGTGTIVNVPRIKAITSKMRMPKSKGAVALNLDHLLEYIPQOVDISNTRATQAFDITWFEAVRXAYDI.SDTEMATL
PepYMV DYNAGTGTIVNVPRIKAITSKMRMPKSKGAVALNLDHLLEYIPQOVDISNTRATQAFDITWFEAVRXAYDI.SDTEMATL
PeSMV DYNAGTGTIVNVPRIKAITSKMRMPKSKGAVALNLDHLLEYIPQOVDISNTRATQAFDITWFEAVRXAYDI.SDTEMATL
PRSV DYNAGTGTIVNVPRIKAITSKMRMPKSKGAVALNLDHLLEYIPQOVDISNTRATQAFDITWFEAVRXAYDI.SDTEMATL
PTV DYNAGTGTIVNVPRIKAITSKMRMPKSKGAVALNLDHLLEYIPQOVDISNTRATQAFDITWFEAVRXAYDI.SDTEMATL
FVV DYNAGTGTIVNVPRIKAITSKMRMPKSKGAVALNLDHLLEYIPQOVDISNTRATQAFDITWFEAVRXAYDI.SDTEMATL
SMV DYNAGTGTIVNVPRIKAITSKMRMPKSKGAVALNLDHLLEYIPQOVDISNTRATQAFDITWFEAVRXAYDI.SDTEMATL
SuCmOV DYNAGTGTIVNVPRIKAITSKMRMPKSKGAVALNLDHLLEYIPQOVDISNTRATQAFDITWFEAVRXAYDI.SDTEMATL
TEV DYNAGTGTIVNVPRIKAITSKMRMPKSKGAVALNLDHLLEYIPQOVDISNTRATQAFDITWFEAVRXAYDI.SDTEMATL
TuMV DYNAGTGTIVNVPRIKAITSKMRMPKSKGAVALNLDHLLEYIPQOVDISNTRATQAFDITWFEAVRXAYDI.SDTEMATL
WMV DYNAGTGTIVNVPRIKAITSKMRMPKSKGAVALNLDHLLEYIPQOVDISNTRATQAFDITWFEAVRXAYDI.SDTEMATL

```

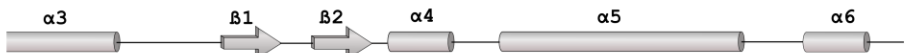

120 130 140 150 160 170 180 190

```

PVY MNGLMVWCIENTGSPNINQVWMMMDGGEQVEYPLKPIVENAHPTRROMAHFSDVAEYIEIERNKKEFYMPRRLGLRNLN
BBzMV MNGLMVWCIENTGSPNINQVWMMMDGGEQVEYPLKPIVENAHPTRROMAHFSDVAEYIEIERNKKEFYMPRRLGLRNLN
BiMoV MNGLMVWCIENTGSPNINQVWMMMDGGEQVEYPLKPIVENAHPTRROMAHFSDVAEYIEIERNKKEFYMPRRLGLRNLN
BiMV MNGLMVWCIENTGSPNINQVWMMMDGGEQVEYPLKPIVENAHPTRROMAHFSDVAEYIEIERNKKEFYMPRRLGLRNLN
BruMV MNGLMVWCIENTGSPNINQVWMMMDGGEQVEYPLKPIVENAHPTRROMAHFSDVAEYIEIERNKKEFYMPRRLGLRNLN
BYMV MNGLMVWCIENTGSPNINQVWMMMDGGEQVEYPLKPIVENAHPTRROMAHFSDVAEYIEIERNKKEFYMPRRLGLRNLN
ChiVMV MNGLMVWCIENTGSPNINQVWMMMDGGEQVEYPLKPIVENAHPTRROMAHFSDVAEYIEIERNKKEFYMPRRLGLRNLN
CIYVV MNGLMVWCIENTGSPNINQVWMMMDGGEQVEYPLKPIVENAHPTRROMAHFSDVAEYIEIERNKKEFYMPRRLGLRNLN
JGMV MNGLMVWCIENTGSPNINQVWMMMDGGEQVEYPLKPIVENAHPTRROMAHFSDVAEYIEIERNKKEFYMPRRLGLRNLN
LMV MNGLMVWCIENTGSPNINQVWMMMDGGEQVEYPLKPIVENAHPTRROMAHFSDVAEYIEIERNKKEFYMPRRLGLRNLN
PeMoV MNGLMVWCIENTGSPNINQVWMMMDGGEQVEYPLKPIVENAHPTRROMAHFSDVAEYIEIERNKKEFYMPRRLGLRNLN
PepMoV MNGLMVWCIENTGSPNINQVWMMMDGGEQVEYPLKPIVENAHPTRROMAHFSDVAEYIEIERNKKEFYMPRRLGLRNLN
PepYMV MNGLMVWCIENTGSPNINQVWMMMDGGEQVEYPLKPIVENAHPTRROMAHFSDVAEYIEIERNKKEFYMPRRLGLRNLN
PeSMV MNGLMVWCIENTGSPNINQVWMMMDGGEQVEYPLKPIVENAHPTRROMAHFSDVAEYIEIERNKKEFYMPRRLGLRNLN
PRSV MNGLMVWCIENTGSPNINQVWMMMDGGEQVEYPLKPIVENAHPTRROMAHFSDVAEYIEIERNKKEFYMPRRLGLRNLN
PTV MNGLMVWCIENTGSPNINQVWMMMDGGEQVEYPLKPIVENAHPTRROMAHFSDVAEYIEIERNKKEFYMPRRLGLRNLN
FVV MNGLMVWCIENTGSPNINQVWMMMDGGEQVEYPLKPIVENAHPTRROMAHFSDVAEYIEIERNKKEFYMPRRLGLRNLN
SMV MNGLMVWCIENTGSPNINQVWMMMDGGEQVEYPLKPIVENAHPTRROMAHFSDVAEYIEIERNKKEFYMPRRLGLRNLN
SuCmOV MNGLMVWCIENTGSPNINQVWMMMDGGEQVEYPLKPIVENAHPTRROMAHFSDVAEYIEIERNKKEFYMPRRLGLRNLN
TEV MNGLMVWCIENTGSPNINQVWMMMDGGEQVEYPLKPIVENAHPTRROMAHFSDVAEYIEIERNKKEFYMPRRLGLRNLN
TuMV MNGLMVWCIENTGSPNINQVWMMMDGGEQVEYPLKPIVENAHPTRROMAHFSDVAEYIEIERNKKEFYMPRRLGLRNLN
WMV MNGLMVWCIENTGSPNINQVWMMMDGGEQVEYPLKPIVENAHPTRROMAHFSDVAEYIEIERNKKEFYMPRRLGLRNLN

```

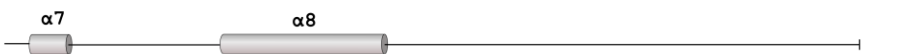

200 210 220 230 240 250 260

```

PVY DGLSLARYAFDFYEVTSRTPFNAREAHIQMKAAALRSQTRIFGLDGGISTQEBENTERRHTEDVSPNMMHLLGVRNM.
BBzMV DGLSLARYAFDFYEVTSRTPFNAREAHIQMKAAALRSQTRIFGLDGGISTQEBENTERRHTEDVSPNMMHLLGVRNM.
BiMoV DGLSLARYAFDFYEVTSRTPFNAREAHIQMKAAALRSQTRIFGLDGGISTQEBENTERRHTEDVSPNMMHLLGVRNM.
BiMV DGLSLARYAFDFYEVTSRTPFNAREAHIQMKAAALRSQTRIFGLDGGISTQEBENTERRHTEDVSPNMMHLLGVRNM.
BruMV DGLSLARYAFDFYEVTSRTPFNAREAHIQMKAAALRSQTRIFGLDGGISTQEBENTERRHTEDVSPNMMHLLGVRNM.
BYMV DGLSLARYAFDFYEVTSRTPFNAREAHIQMKAAALRSQTRIFGLDGGISTQEBENTERRHTEDVSPNMMHLLGVRNM.
ChiVMV DGLSLARYAFDFYEVTSRTPFNAREAHIQMKAAALRSQTRIFGLDGGISTQEBENTERRHTEDVSPNMMHLLGVRNM.
CIYVV DGLSLARYAFDFYEVTSRTPFNAREAHIQMKAAALRSQTRIFGLDGGISTQEBENTERRHTEDVSPNMMHLLGVRNM.
JGMV DGLSLARYAFDFYEVTSRTPFNAREAHIQMKAAALRSQTRIFGLDGGISTQEBENTERRHTEDVSPNMMHLLGVRNM.
LMV DGLSLARYAFDFYEVTSRTPFNAREAHIQMKAAALRSQTRIFGLDGGISTQEBENTERRHTEDVSPNMMHLLGVRNM.
PeMoV DGLSLARYAFDFYEVTSRTPFNAREAHIQMKAAALRSQTRIFGLDGGISTQEBENTERRHTEDVSPNMMHLLGVRNM.
PepMoV DGLSLARYAFDFYEVTSRTPFNAREAHIQMKAAALRSQTRIFGLDGGISTQEBENTERRHTEDVSPNMMHLLGVRNM.
PepYMV DGLSLARYAFDFYEVTSRTPFNAREAHIQMKAAALRSQTRIFGLDGGISTQEBENTERRHTEDVSPNMMHLLGVRNM.
PeSMV DGLSLARYAFDFYEVTSRTPFNAREAHIQMKAAALRSQTRIFGLDGGISTQEBENTERRHTEDVSPNMMHLLGVRNM.
PRSV DGLSLARYAFDFYEVTSRTPFNAREAHIQMKAAALRSQTRIFGLDGGISTQEBENTERRHTEDVSPNMMHLLGVRNM.
PTV DGLSLARYAFDFYEVTSRTPFNAREAHIQMKAAALRSQTRIFGLDGGISTQEBENTERRHTEDVSPNMMHLLGVRNM.
FVV DGLSLARYAFDFYEVTSRTPFNAREAHIQMKAAALRSQTRIFGLDGGISTQEBENTERRHTEDVSPNMMHLLGVRNM.
SMV DGLSLARYAFDFYEVTSRTPFNAREAHIQMKAAALRSQTRIFGLDGGISTQEBENTERRHTEDVSPNMMHLLGVRNM.
SuCmOV DGLSLARYAFDFYEVTSRTPFNAREAHIQMKAAALRSQTRIFGLDGGISTQEBENTERRHTEDVSPNMMHLLGVRNM.
TEV DGLSLARYAFDFYEVTSRTPFNAREAHIQMKAAALRSQTRIFGLDGGISTQEBENTERRHTEDVSPNMMHLLGVRNM.
TuMV DGLSLARYAFDFYEVTSRTPFNAREAHIQMKAAALRSQTRIFGLDGGISTQEBENTERRHTEDVSPNMMHLLGVRNM.
WMV DGLSLARYAFDFYEVTSRTPFNAREAHIQMKAAALRSQTRIFGLDGGISTQEBENTERRHTEDVSPNMMHLLGVRNM.

```



**Fig. S2. Consensus sequence alignment of potyviral CPs.** CP sequences of PVY (36), banana bract mosaic virus (BBrMV) (64), Bidens mottle virus (BiMoV) (9), Bidens mosaic virus (BiMV) (4), Brugmansia mosaic virus (BruMV) (5), bean yellow mosaic virus (BYMV) (45), chilli veinal mottle virus (ChiVMV) (15), clover yellow vein virus (CIYVV) (13), johnsongrass mosaic virus (JGMV) (28), lettuce mosaic virus (LMV) (12), peanut mottle virus (PeMoV) (12), pepper mottle virus (PepMoV) (7), pepper yellow mosaic virus (PepYMV) (10), pepper severe mosaic virus (PeSMV) (5), papaya ringspot virus (PRSV) (44), Peru tomato mosaic virus (PTV) (6), potato virus V (PVV) (32), soybean mosaic virus (SMV) (59), sunflower chlorotic mottle virus (SuCMoV) (5), tobacco etch virus (TEV) (77), turnip mosaic virus (TuMV) (73) and watermelon mosaic virus (WMV) (54) were obtained from NCBI database (<https://www.ncbi.nlm.nih.gov/>) (number of sequences for each CP is in brackets) and aligned with ClustalW algorithm in MEGA7 (56). Consensus sequences were created in BioEdit (57) and aligned using identity protein weight matrix in MEGA7. ‘X’: non-consensus positions at frequency threshold of 60 %. The alignment is presented using ESPript 3.0 (<http://espript.ibcp.fr/ESPript/ESPript/>). Green box: the conserved DAG site; green arrows: conserved RNA binding residues. Above: a scheme of PVY CP secondary structure.

**A**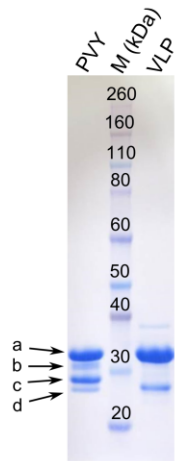**B**

|     | SDS-PAGE band | N-terminal sequence     | Deletion*           |
|-----|---------------|-------------------------|---------------------|
| PVY | a             | GNDTI<br>DAGGS<br>NVGTS | /<br>ΔN5<br>ΔN34    |
|     | b             | GNDTI<br>KDAKQ<br>KQEQG | /<br>ΔN12<br>ΔN15   |
|     | c             | DAGGS<br>QEQGS<br>KEKEK | ΔN5<br>ΔN16<br>ΔN27 |
|     | d             | APQIQ<br>TSPNI          | ΔN73<br>ΔN123       |
| VLP | a             | GNDTI                   | /                   |
|     | b             | NA**                    | NA**                |

\* Number of deleted amino acids from N-terminus, based on the reads from Edman sequencing. \*\* The N-terminal sequence was not readable.

**C**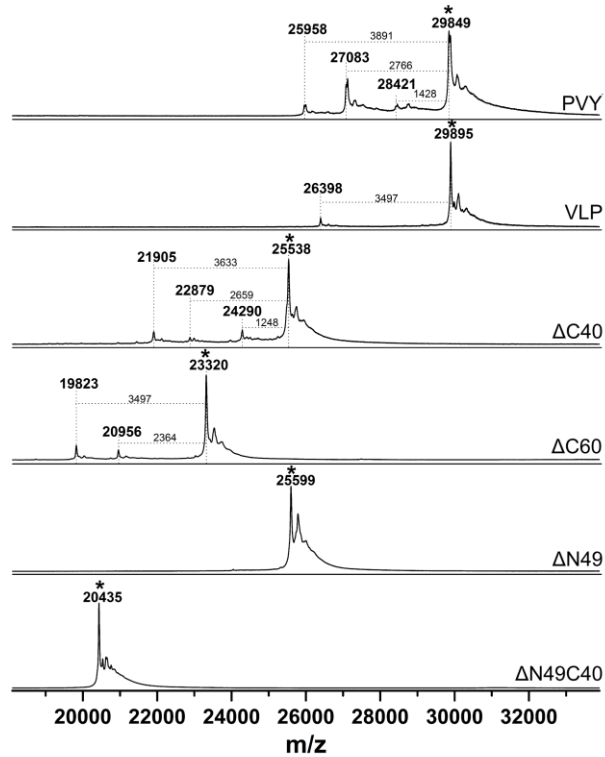**D**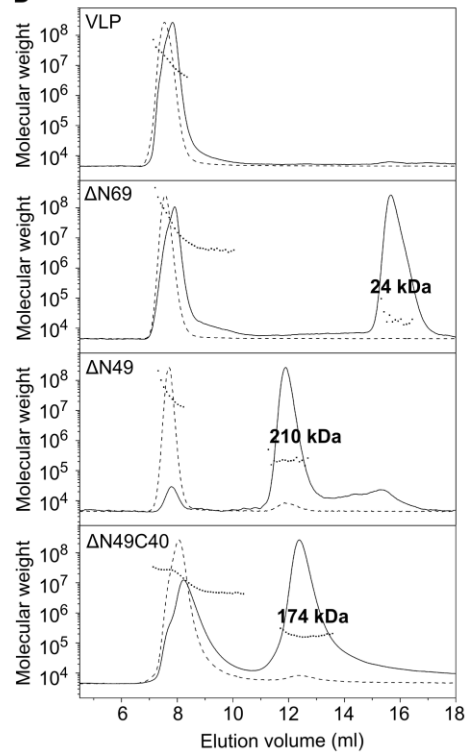**E**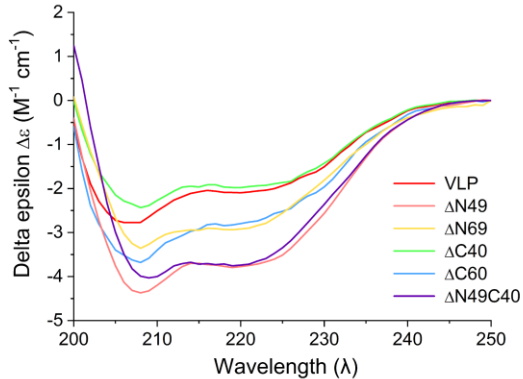

**Fig. S3. Biophysical characterization of PVY virions and various VLP constructs.** (A) SDS-PAGE bands transferred to a PVDF membrane reveal proteolysis of the CP in both the PVY and VLP samples. (B) Edman sequencing of bands in (A). The intact CP unit is found in band 'a' of both, PVY and VLP, while additional lower bands 'b-d' represent proteolysed CP units. Sequence reads of each band are displayed together with their assigned number of missing N-terminal amino acids. (C) Comparison of MALDI-TOF mass spectra of PVY and different VLP constructs. The peaks corresponding to full-length proteins are marked with \*. Peaks at smaller m/z representing truncated protein species are observed in all the spectra except for  $\Delta N49$  and  $\Delta N49C40$ . (D) SEC-MALS chromatograms (solid lines: UV response, dashed lines: light scattering response at 90° angle) for wild-type VLP filaments and non-filamentous constructs  $\Delta N69$ ,  $\Delta N49$  and  $\Delta N49C40$ . (E) Circular dichroism spectra of wild-type VLP and deletion mutants  $\Delta N49$ ,  $\Delta N69$ ,  $\Delta C40$ ,  $\Delta C60$  and  $\Delta N49C40$ .

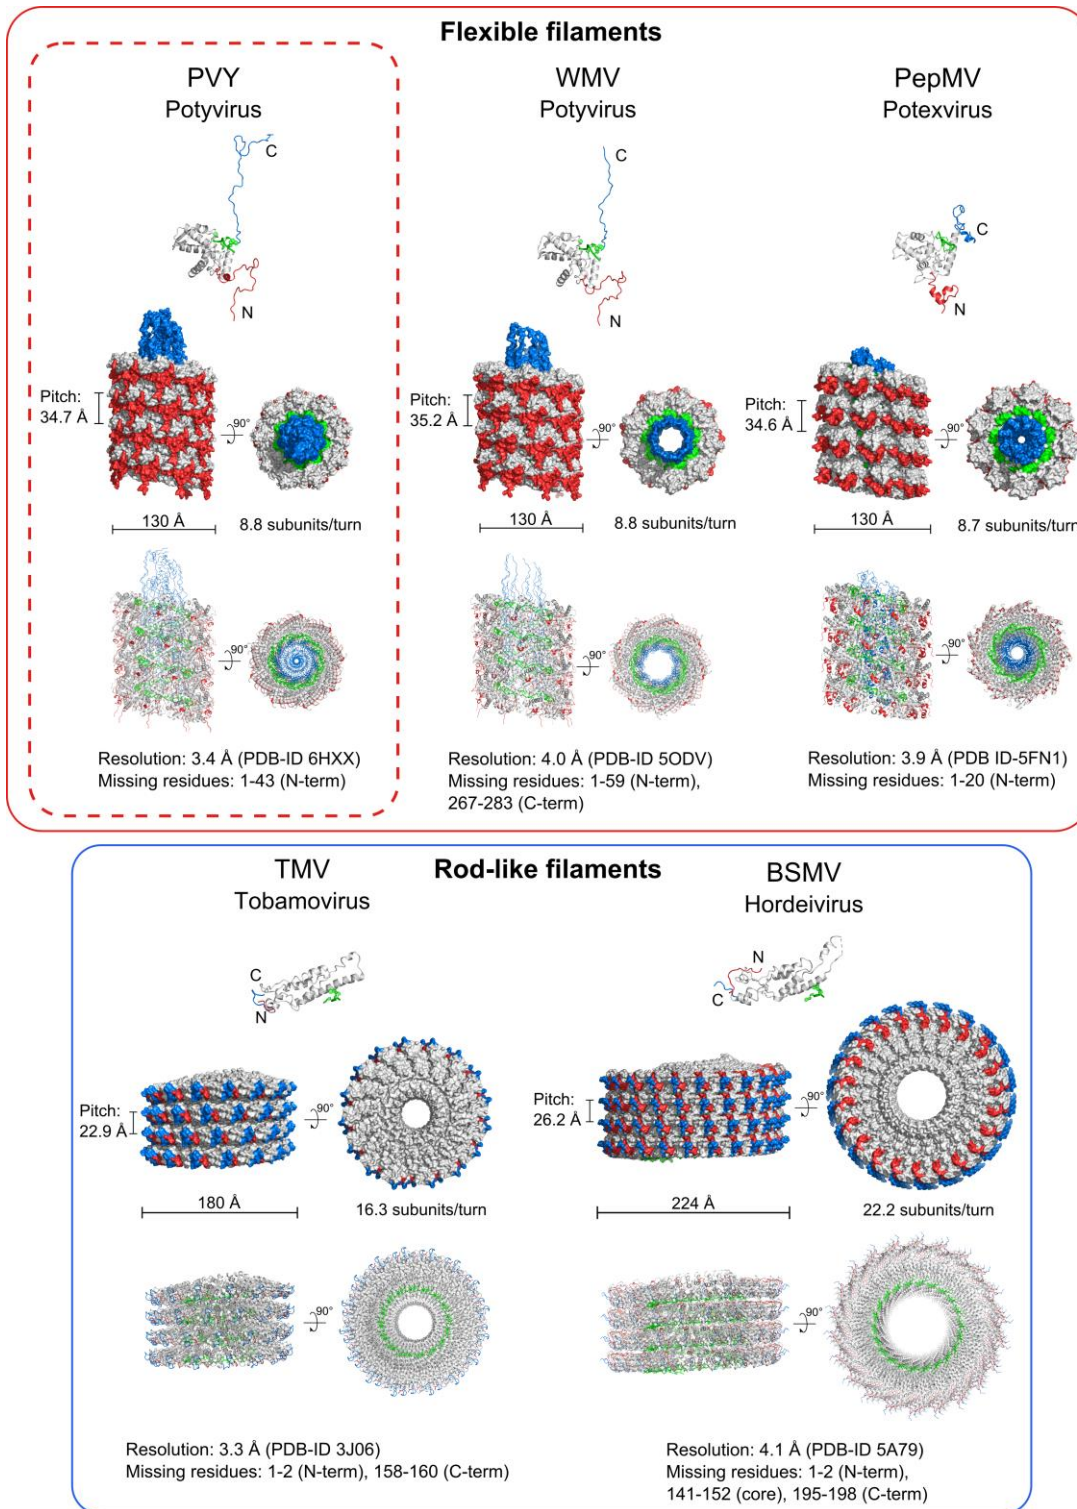

**Fig. S4. Structural comparison of PVY to other filamentous viruses, flexible and rod shaped.** For all viruses, the structure of a single CP unit is shown in cartoon, N-terminal region in red, core in gray, C-terminal region in blue and RNA in green color. Viral filaments are shown in surface and cartoon representation, side and top-view.

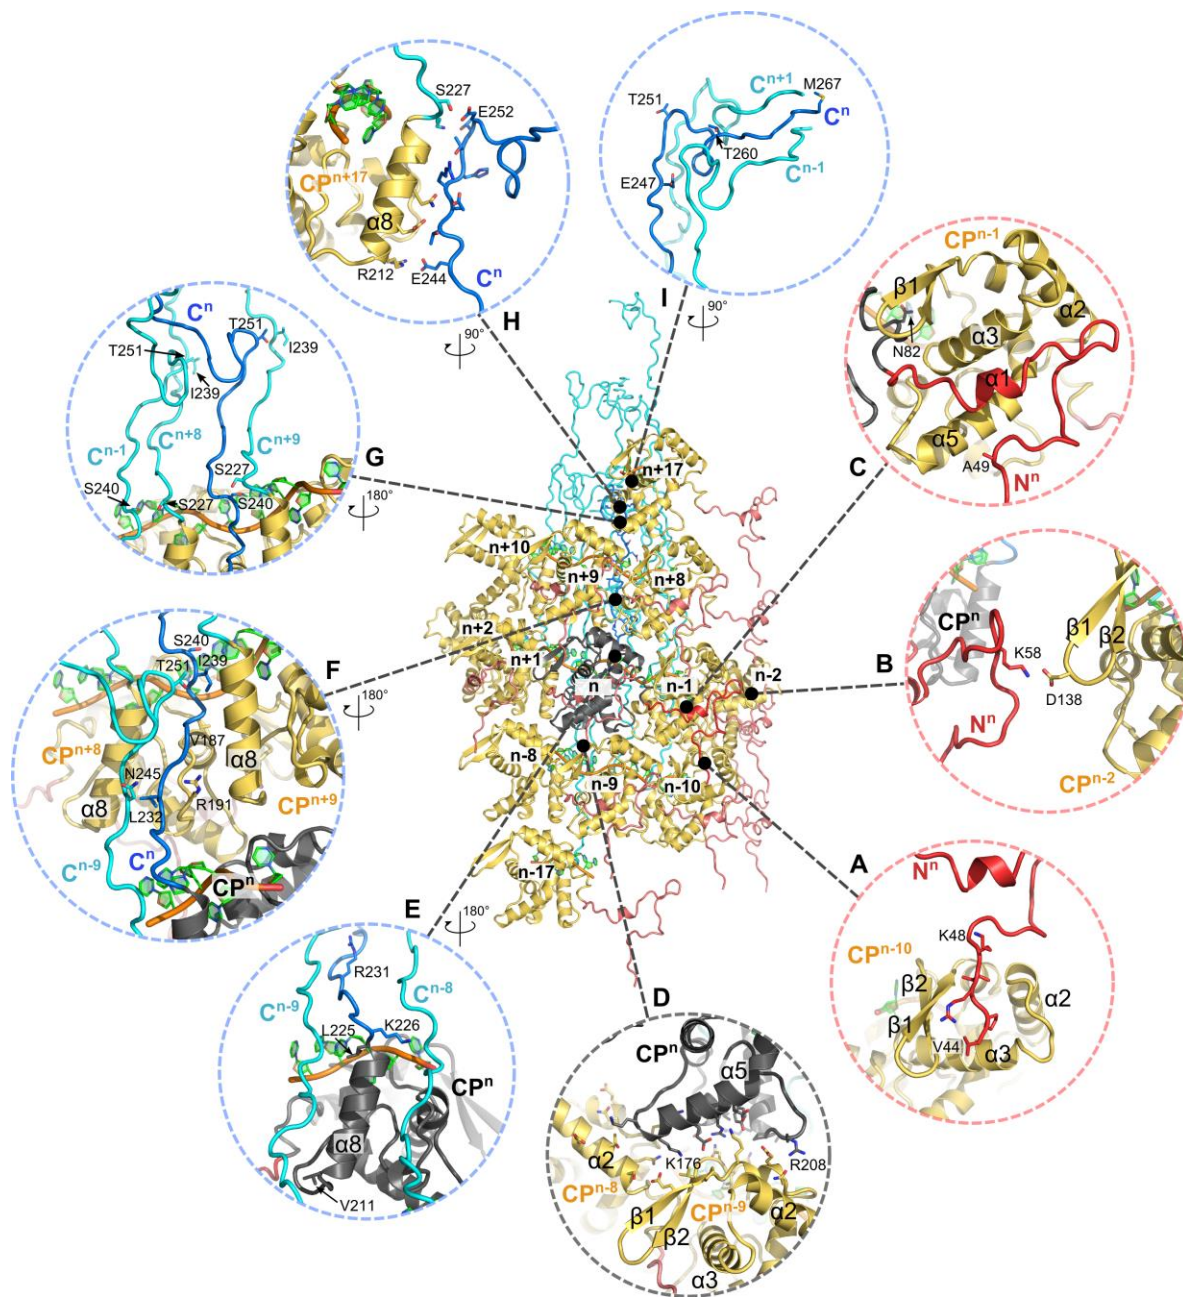

**Fig. S5. Details of the PVY interaction network.** Assembly of 13 interacting CP units is presented in the center of the figure. CP<sup>n</sup> N-terminal region is in red, core in dark gray and C-terminal region in blue, while neighboring CPs are colored in light red (N-terminal region), yellow (core) and light blue (C-terminal region). Close-up views display specific interaction sites between CP units (red circles display interactions given by the CP<sup>n</sup> N-terminal region, black circle the interactions between the cores, and blue circles show interactions given by CP<sup>n</sup> C-terminal region). For clarity, some non-interacting parts were removed from the picture. The interactions between CP units are presented from CP<sup>n</sup> N- to C-terminus: (A) CP<sup>n</sup> – CP<sup>n-10</sup>, (B) CP<sup>n</sup> – CP<sup>n-2</sup>, (C) CP<sup>n</sup> – CP<sup>n-1</sup>, (D) CP<sup>n</sup> – CP<sup>n-8</sup> – CP<sup>n-9</sup>, (E) CP<sup>n</sup> – CP<sup>n-8</sup> – CP<sup>n-9</sup>, (F) CP<sup>n</sup> – CP<sup>n-9</sup> – CP<sup>n+8</sup> – CP<sup>n+9</sup>, (G) CP<sup>n</sup> – CP<sup>n+8</sup> – CP<sup>n+9</sup> – CP<sup>n-1</sup>, (H) CP<sup>n</sup> – CP<sup>n+17</sup> and (I) CP<sup>n</sup> – CP<sup>n+1</sup> – CP<sup>n-1</sup>.



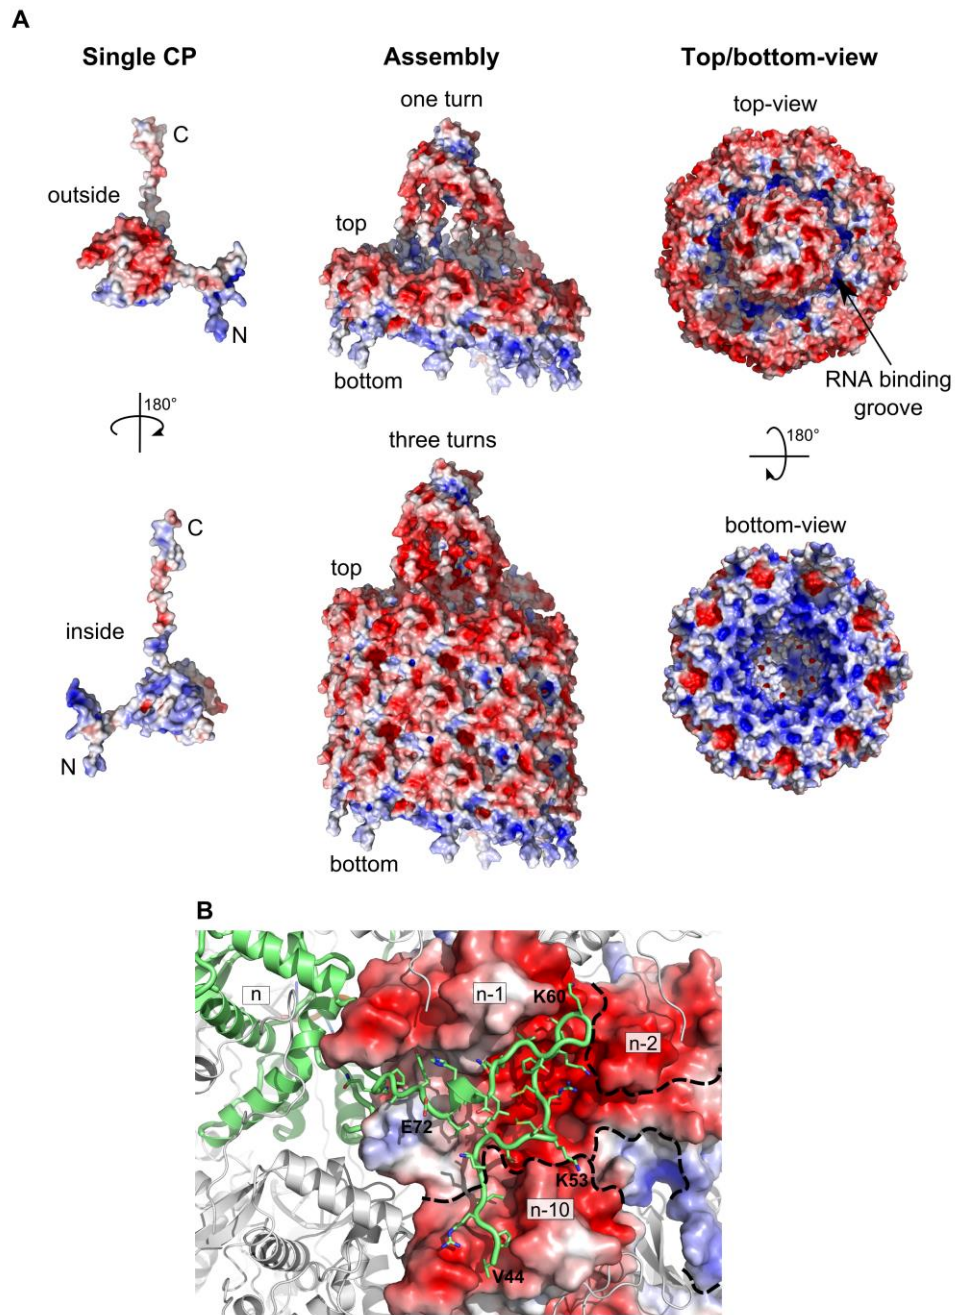

**Fig. S6. Electrostatic interactions are crucial for PVY virion assembly.** (A) Surface electrostatic potential (red: negative charge; blue: positive charge) of a single CP unit (left); CP units assembled into one turn (above center) and the filament (below center). Right: top- and bottom-view of the filament. The RNA-binding groove is highly positively charged to bind viral ssRNA. (B) Highly negatively charged surface of neighboring units  $CP^{n-1}$ ,  $CP^{n-2}$  and  $CP^{n-10}$  promote folding of positively charged  $CP^n$  N-terminal region on their surface. The  $CP^n$  unit is shown as a green cartoon.

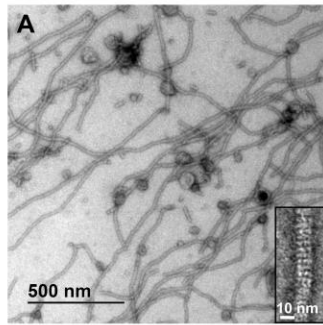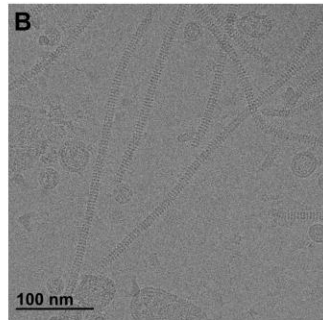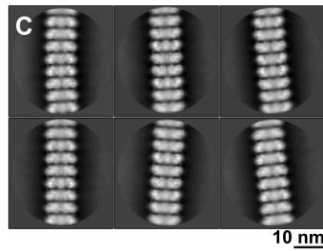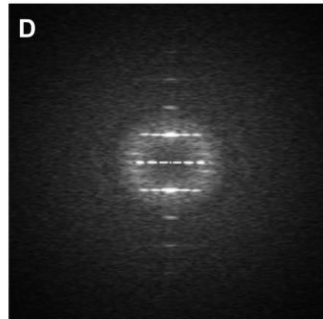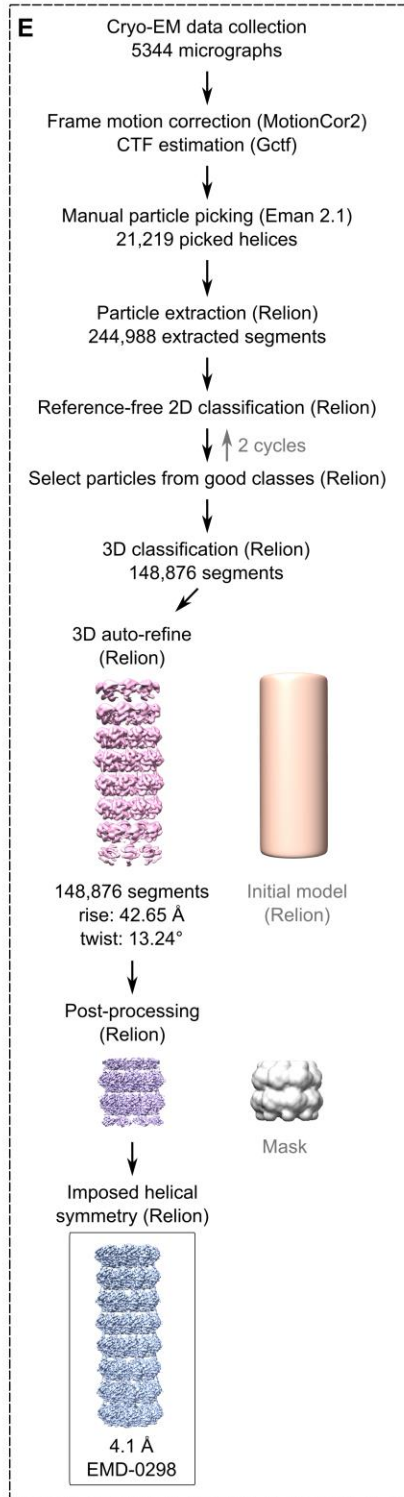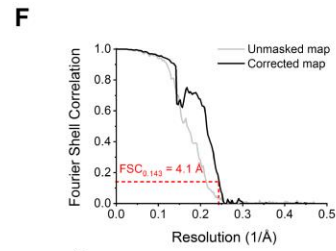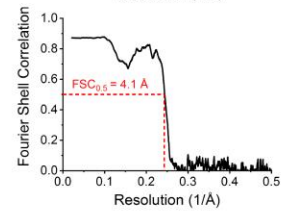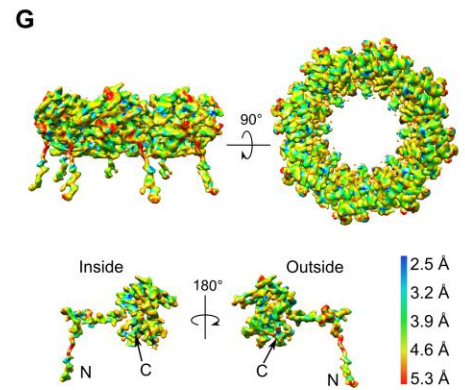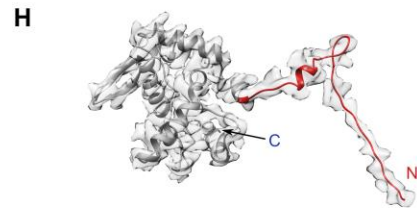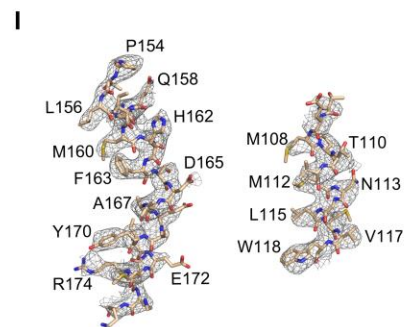



**Fig. S7. Cryo-EM data collection, image processing, and model building for VLP. (A)** Negative-stain TEM micrograph of VLPs. Inset: a close-up of one VLP segment. **(B)** Cryo-EM micrograph of VLPs. **(C)** Examples of VLP 2D class averages. **(D)** Sum of the power spectra obtained for 26 selected VLP segments. **(E)** Flowchart of the data collection and processing of VLP sample. **(F)** Fourier shell correlation (FSC) curves for the final reconstruction of VLP density map (above) and between VLP reconstructed model and density map (below). **(G)** Local resolution analysis of one ring extracted from VLP filament (above) and one CP unit (below), estimated using MonoRes (34). **(H)** Cryo-EM-derived atomic model of the VLP CP fit into extracted map for one CP unit. **(I)** The densities of two VLP CP segments are shown in a mesh representation with the corresponding atomic model within, showing the resolution of individual side chains (maps contoured at  $5\sigma$ ).

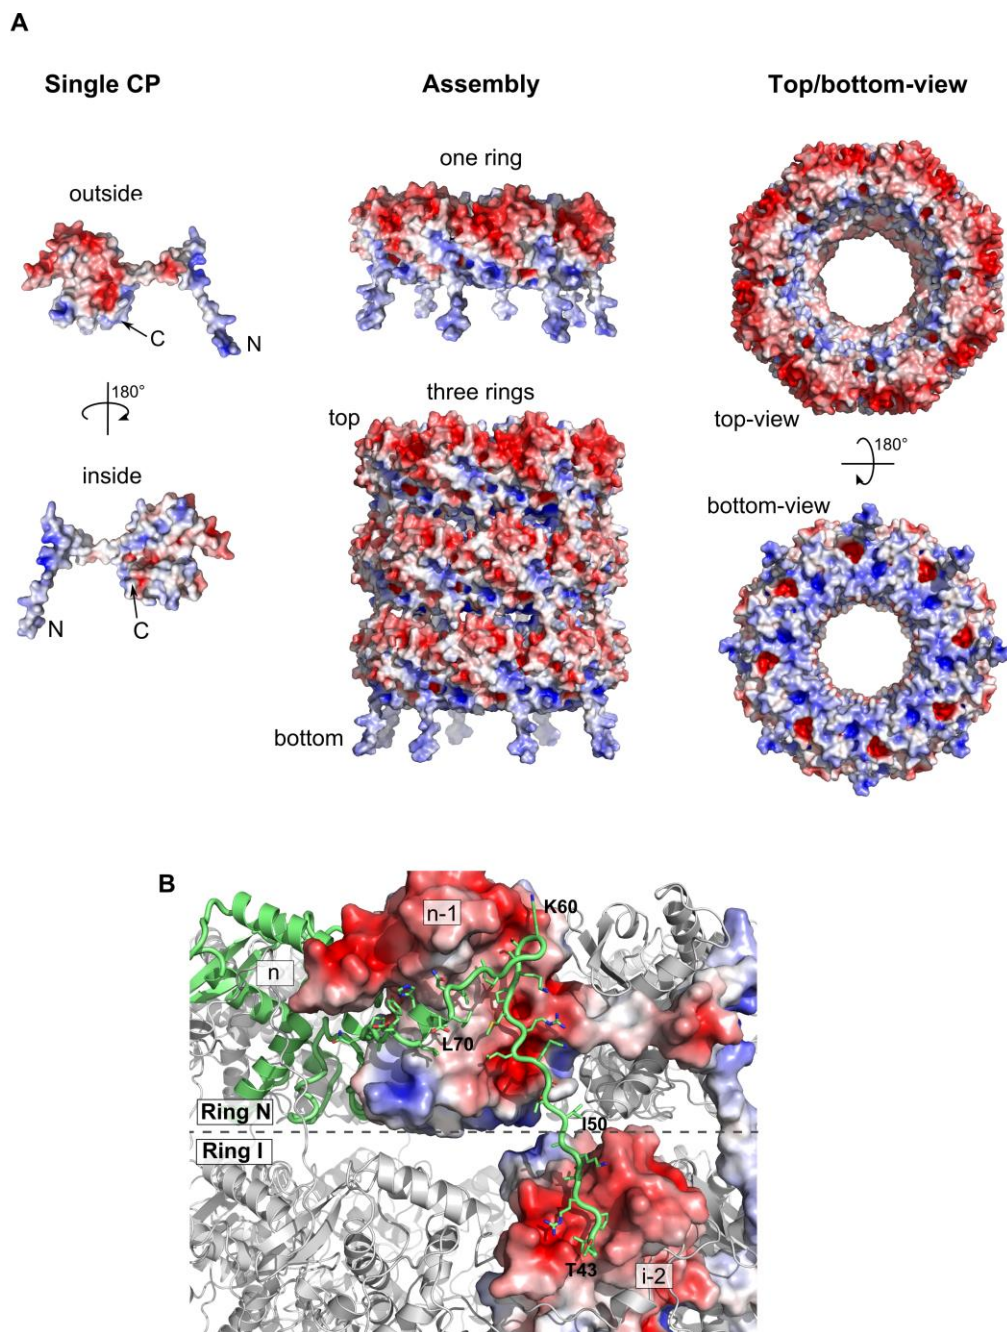

**Fig. S8. Surface electrostatic potential of VLPs.** (A) Surface electrostatic potential of single CP unit, views at two angles (left); CP units assembled into one ring (above center) and rings assembled into the filament (below center). Right: top- and bottom-view of the octameric ring. Red, negative charge; blue, positive charge. (B) Assembly of  $CP^n$  unit (green) with positively charged N-terminal region folding on the negatively charged surfaces of  $CP^{n-1}$  and  $CP^{i-2}$  cores.

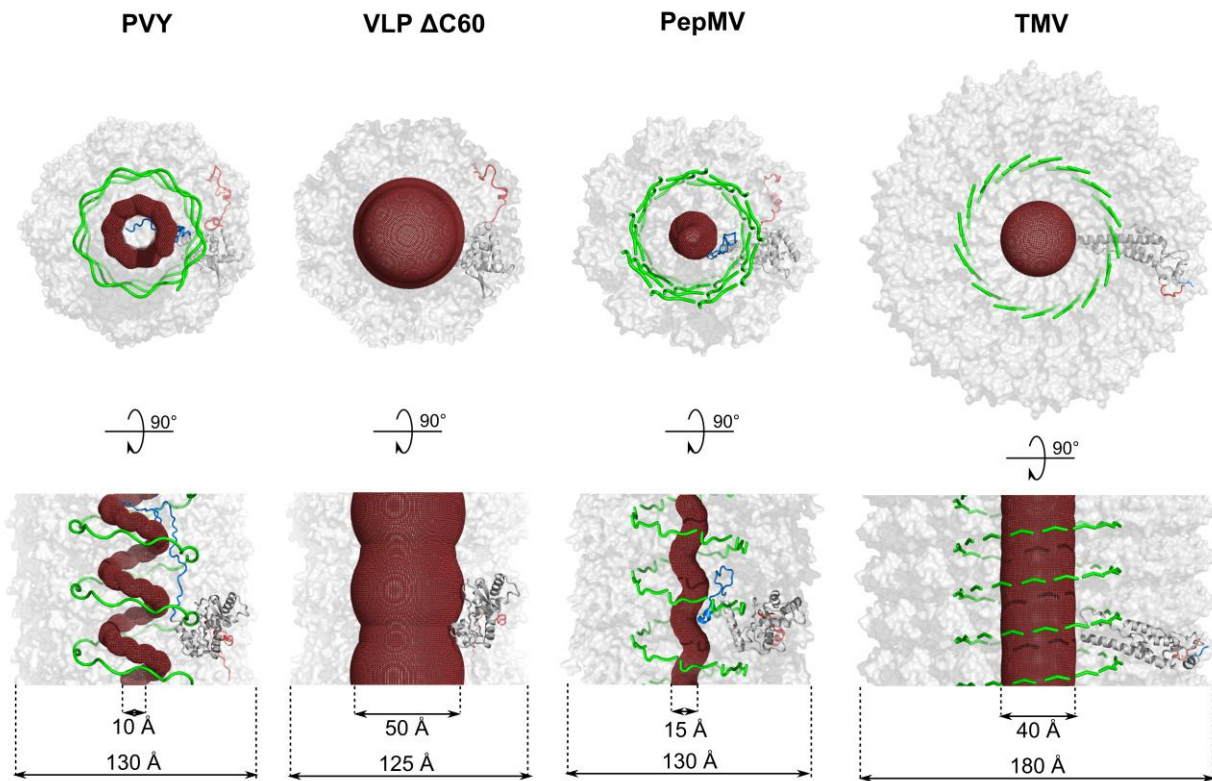

**Fig. S9. Water channels in different types of filamentous particles.** Differences in size and shape of the channels in potyvirus PVY, potexvirus PepMV, tobamovirus TMV and PVY VLP  $\Delta$ C60 are presented as side-views and top-views. Channels (dark red dot mesh) are superimposed onto filament silhouette with one copy of CP (N-terminal region in red, core in gray, C-terminal region in blue) and RNA (green), to demonstrate particle assembly. Channels were calculated with MOLE 2.5 (<https://mole.upol.cz/>).

**Table S1. Cryo-EM data collection and refinement statistics of PVY and VLP.**

|                                                 | PVY                       | VLP                  |
|-------------------------------------------------|---------------------------|----------------------|
| <b>Data collection</b>                          |                           |                      |
| EM equipment                                    | FEI Titan Krios           |                      |
| Voltage (kV)                                    | 300                       |                      |
| Detector                                        | Falcon II                 |                      |
| Pixel size (Å)                                  | 1.061                     |                      |
| Electron dose (e <sup>-</sup> /Å <sup>2</sup> ) | 48                        |                      |
| Defocus range (μm)                              | 1.0-2.2                   |                      |
| <b>Reconstruction</b>                           |                           |                      |
| Software                                        | EMAN2.1, RELION 2.0 & 2.1 |                      |
| Initial no. of helical segments                 | 215,123                   | 244,988              |
| Final no. of helical segments                   | 162,213                   | 148,876              |
| Initial model used                              | Geometrical model         | Featureless cylinder |
| Symmetry                                        | C1                        | C8                   |
| Helical symmetry                                |                           |                      |
| Translation (Å)                                 | 3.95                      | 42.65                |
| Rotation (°)                                    | -40.95                    | 13.24                |
| Map resolution (Å) at FSC = 0.143               | 3.4                       | 4.1                  |
| Map sharpening B-factor (Å <sup>2</sup> )       | -200                      | -400                 |
| <b>Model building</b>                           |                           |                      |
| Software                                        | Coot 0.8.8                |                      |
| <b>Refinement</b>                               |                           |                      |
| Software                                        | Phenix 1.13-2998          |                      |
| <b>Model statistics</b>                         |                           |                      |
| No. of coat protein copies                      | 35                        | 24                   |
| No. of residues per coat protein                | 224 (Val44 – Met267)      | 176 (Thr43 – Ile218) |
| No. of RNA nucleotides                          | 175                       | 0                    |
| Model resolution (Å) at FSC = 0.5               | 3.6                       | 4.1                  |
| <b>Validation</b>                               |                           |                      |
| Cross-correlation coefficient (CCC)             | 0.819                     | 0.775                |
| MolProbity score                                | 1.93                      | 1.48                 |
| Clashscore                                      | 8.18                      | 0.37                 |
| R.m.s. deviations                               |                           |                      |
| Bond length (Å)                                 | 0.008                     | 0.009                |
| Bond angle (°)                                  | 1.389                     | 1.314                |
| Ramachandran plot statistics (%)                |                           |                      |
| Preferred                                       | 91.89                     | 86.73                |
| Allowed                                         | 8.11                      | 13.27                |
| Outlier                                         | 0                         | 0                    |
| Rotamer outliers                                | 0.28                      | 1.95                 |

**Table S2. Primers and probes used for in planta functional analysis of PVY mutants and their properties.\***

| Name     | Primer and probe sequences (5' → 3')                                                            | Source                    | Target gene(s)     | Description        | Amplicon efficiency |
|----------|-------------------------------------------------------------------------------------------------|---------------------------|--------------------|--------------------|---------------------|
| PVY_N605 | CATAGGAGAACTGAAATGCCAACT<br>TGGCGAGGTTCCATTTCA<br>FAM-TGATGAATGGGCTTATGGTTGGTGCA-<br>TAMRA      | this work<br>(59)<br>(59) | AJ390300           | PVY CP             | 97%                 |
| COX      | CGTCGCATTCCAGATTATCCA<br>CAACTACGGATATATAAGRRCRRAACTG<br>FAM-TGCTTACGCTGGATGGAATGCCCT-<br>TAMRA | (60)                      | Sotub04g015050.1.1 | cytochrome oxidase | 96%                 |

\*according to MIQE (58) guidelines.

**Data S1. Relative concentration of PVY RNA as measured in the leaves of *N. clevelandii* including tables S3 to S5:**

**Table S3. Relative concentration of PVY RNA as measured in bombarded leaves of *N. clevelandii* 7 dpb (experiment 1).**

**Table S4. Relative concentration of PVY RNA as measured in upper nonbombarded leaves of *N. clevelandii* 14 dpb (experiment 1).**

**Table S5. Relative concentration of PVY RNA as measured in bombarded leaves of *N. clevelandii* (experiment 2).**
